# Supplementary material for: Comparison of individual food products may underestimate the underlying environmental impacts
Source: Research Square preprint supplement (doi:10.21203/rs.3.rs-4532942/v1), 2025-10-30
Supplement: Supplementary file 1 [file 673f3dd3d100d7ba75508e10.pdf]

## Supplementary material

### Comparison of individual food products may underestimate the underlying environmental impacts

Venla Kyttä<sup>1,2\*</sup>, Merja Saarinen<sup>2</sup>, Marja Roitto<sup>1,3</sup>, Hanna L. Tuomisto<sup>1,2,3</sup>

<sup>1</sup>Future Sustainable Food Systems –research group, Department of Agricultural Sciences, Faculty of Agriculture and Forestry, University of Helsinki, Helsinki, Finland

<sup>2</sup>Natural Resources Institute Finland, Helsinki, Finland

<sup>3</sup>Helsinki Institute of Sustainability Science (HELSUS), University of Helsinki, Helsinki, Finland

*\*Corresponding author. E-mail address: venla.kytta@helsinki.fi*

## Table of Contents

|                                                         |   |
|---------------------------------------------------------|---|
| Table of Contents .....                                 | 1 |
| 1. System models.....                                   | 2 |
| 1.1. By-product categories .....                        | 2 |
| 1.2. Slaughtering.....                                  | 2 |
| 2. By-products.....                                     | 3 |
| 2.1. By-product processing and their alternatives ..... | 3 |
| 2.1.1. Processing of hides.....                         | 3 |
| 2.1.2. Pet food and fur animal feed .....               | 4 |
| 2.1.3. MBM and tallow processing .....                  | 5 |
| 2.1.4. Anaerobic digestion .....                        | 6 |
| 2.1.5. Gelatine and pectin .....                        | 6 |
| 3. References .....                                     | 7 |

## 1. System models

### 1.1. By-product categories

Animal by-products are categorized into three groups according the level of risk to public and animal health, which defines how the products can be utilized (European Union, 2009). Broadly, Cat. 3 material consists of former foodstuffs and by-products that are suitable for human consumption but are not used as food for example for commercial reasons, and blood, hides, skins, hooves, feathers, wool, horns, hair and fur originating from healthy animals. Cat. 2 material is by-products that are declared unfit for human consumption, contain disease risk other than Transmissible spongiform encephalopathies (TSE), animals dead or killed for other than human consumption and manure and digestive tract content. Cat. 1 material contains bodies and body parts suspected of being infected by a TSE, special risk materials, animal other than wild or farmed animals and products containing prohibited substances or environmental toxins above the legal limit. The exact classification criteria is given in European Union (2009).

*Table S1. Shares of different product categories from live weight pork (Gac et al., 2014).*

| <i>Product</i>      | <i>% from live weight</i> |
|---------------------|---------------------------|
| Meat & edible offal | 70 %                      |
| Food grade bones    | 9 %                       |
| Cat. 3 material     | 9 %                       |
| Cat. 2 material     | 5 %                       |
| Cat. 1 material     | 7 %                       |

\* Cat. 3 fat included

### 1.2. Slaughtering

The amount of electricity, natural gas and water consumed in the slaughtering process was obtained from Mogensen et al. (2015). Data concerning masses and uses of beef meat and by-products was obtained directly from meat company (Table S2). The averages from years 2017-2019 were used for calculation of product yields and prices.

Table S2. Inputs and outputs of slaughtering of beef and pork.

| BEEF | Inputs                      | Amount   | Reference               | Outputs                        | Amount   | Reference          |
|------|-----------------------------|----------|-------------------------|--------------------------------|----------|--------------------|
|      | Bovine animal (live weight) | 1kg      | Company                 | Meat and edible offal          | 0.479 kg | Meat company       |
|      | Electricity                 | 0.60 kWh | (Mogensen et al., 2016) | Hides                          | 0.036 kg | Meat company       |
|      | Natural gas                 | 0.04 kWh | (Mogensen et al., 2016) | Inedible offal                 | 0.089 kg | Meat company       |
|      | Water                       | 0.99 l   | (Mogensen et al., 2016) | Cat. 2 material                | 0.170 kg | Meat company       |
|      |                             |          |                         | Mixture of cat. 3 & 2 material | 0.148 kg | Meat company       |
|      |                             |          |                         | Cat. 1 material                | 0.076 kg | Meat company       |
| PORK | Inputs                      | Amount   | Reference               | Outputs                        | Amount   | Reference          |
|      | Pork                        | 1 kg     |                         | Meat and edible offal          | 0.7 kg   | (Gac et al., 2014) |
|      | Electricity                 | 0.22 kWh | (Reckmann et al., 2013) | Inedible offal*                | 0.09 kg  | (Gac et al., 2014) |
|      | Water                       | 3.33 l   | (Reckmann et al., 2013) | Cat. 2 material                | 0.05 kg  | (Gac et al., 2014) |
|      |                             |          |                         | Mixture of cat. 3 & 2 material | 0.09 kg  | (Gac et al., 2014) |
|      |                             |          |                         | Cat. 1 material                | 0.07 kg  | (Gac et al., 2014) |

\*Includes category 3 fat

## 2. By-products

### 2.1. By-product processing and their alternatives

#### 2.1.1. Processing of hides

Processing hides to leather was modelled based on data adapted from leather LCA study (Joseph and Nithya, 2009) (Table S3), concerning life cycle stages of preservation, tanning and finishing and waste management. Due lack of data wetting agent, preservative, enzymebate, calcium hydroxide and chrome sulphate were not included. The solid waste generated in processing was assumed to be treated as landfill (Notarnicola et al., 2011). As the output amount of finished leather is given as square meters, the output weight of finished leather was assumed to be 20% of raw hides (De Rosa-Giglio et al., 2018).

Table S3. Inputs and outputs of hide processing.

| <b>Inputs</b>               | <b>Amount</b> | <b>Outputs</b> | <b>Amount</b> |
|-----------------------------|---------------|----------------|---------------|
| Hides                       | 1 kg          | Leather        | 0.2 kg        |
| Ammonium chloride           | 0.0167 kg     | solid waste    | 0.5253 kg     |
| Electricity, medium voltage | 0.5637 kWh    | wastewater     | 0.0196 kg     |
| Salt                        | 0.4 kg        |                |               |
| Sodium bicarbonate          | 0.0138 kg     |                |               |
| Sodium carbonate            | 0.0035 kg     |                |               |
| Sodium formate              | 0.0124 kg     |                |               |
| Sodium hydrogen sulfate     | 0.0038 kg     |                |               |
| Sodium sulfide              | 0.0285 kg     |                |               |
| Sulfuric acid               | 0.0143 kg     |                |               |
| Water                       | 0.0211 kg     |                |               |

### 2.1.2. Pet food and fur animal feed

Inedible offal are processed into pet food, whereas category 2 material is used for fur animal feed. No processing was assumed before point of substitution, since ingredients used for pet food are fresh by-products (FEDIAF, 2018). Since the function of these products is to provide nutrition, especially protein and fat, the substituting amounts were equalized according protein contents derived from FoodData Central (U.S. Department of Agriculture, 2019). The protein content of beef by-products were assumed to be 14.97% (FDC ID: 168630) and pork to 15.03% (FDC ID: 168272) based on protein contents of raw variety meats and by-products (U.S. Department of Agriculture, 2019).

For alternative pet food and fur animal feed, market mix was created by subtracting beef and pork by-products from prepared pet food ingredients (FEDIAF, 2018). The share of ingredients and their protein contents are presented in Table S4 and the data used in modelling is presented in table S5. Chicken by-products used in pet food were assumed to originate 34.6% of live weight of chicken (Ecoinvent market dataset) and allocation to these by-products was done based on economic allocation 3.4% (FEDIAF, 2018). The protein content of pet food alternative was set to 12.13%.

Table S4. Pet food and fur animal feed alternative ingredients and their protein contents. Ingredients adapted from FEDIAF (2018) and protein contents from FoodData Central (U.S. Department of Agriculture, 2019).

| <b>Ingredient</b> | <b>Amount</b> | <b>Protein content</b> | <b>Protein content reference ID in FoodData Central</b> |
|-------------------|---------------|------------------------|---------------------------------------------------------|
| Maize starch      | 7 %           | 0 %                    | FDC ID: 1198449                                         |
| Maize             | 15 %          | 9.42 %                 | FDC ID: 170288                                          |
| Rice              | 3 %           | 6.61 %                 | FDC ID: 169760                                          |
| Wheat grains      | 21 %          | 11.31 %                | FDC ID: 169719                                          |

|                            |      |         |                |
|----------------------------|------|---------|----------------|
| Wheat flour                | 13 % | 15.10 % | FDC ID: 790085 |
| Soybeans                   | 6 %  | 36.49 % | FDC ID: 174270 |
| Poultry by-products, fresh | 36 % | 11.39 % | FDC ID: 171104 |

*Table S5. Inputs and outputs of pet food & fur animal feed alternative.*

| <b>Inputs</b>       | <b>Amount</b> | <b>Outputs</b>                        | <b>Amount</b> |
|---------------------|---------------|---------------------------------------|---------------|
| Poultry by-products | 0.36 kg       | Pet food/ fur animal feed alternative | 1 kg          |
| Maize, grain        | 0.15 kg       |                                       |               |
| Maize starch        | 0.07 kg       |                                       |               |
| Rice                | 0.03 kg       |                                       |               |
| Soybean             | 0.06 kg       |                                       |               |
| Wheat flour         | 0.13 kg       |                                       |               |
| Wheat, grain        | 0.21 kg       |                                       |               |

### 2.1.3. MBM and tallow processing

Mixture of by-products are processed by rendering (Ecoinvent: treatment of slaughterhouse waste, rendering, slaughterhouse waste) and the process yields 25% meat and bone meal and 17% tallow (Ecoinvent).

The tallow from the rendering is further processed to biodiesel, which was modelled based on data presented in LCA study of production of biodiesel from rendered lipids (López et al., 2010) (Table S6).

*Table S6. Inputs and outputs of biodiesel production from tallow. Adapted from López et al. (2010).*

| <b>Inputs</b>                                           | <b>Amount</b> | <b>Outputs</b>          | <b>Amount</b> |
|---------------------------------------------------------|---------------|-------------------------|---------------|
| Tallow                                                  | 1 kg          | Biodiesel               | 0.99 kg       |
| Electricity, medium voltage                             | 0.367 MJ      | Glycerol                | 0.1287 kg     |
| Heat, district or industrial, natural gas               | 6.974 MJ      | sodium chloride, powder | 0.0089 kg     |
| Hydrochloric acid, without water, in 30% solution state | 0.006 kg      | Water                   | 0.004 kg      |
| Methanol                                                | 0.099 kg      |                         |               |
| Neutralising agent, sodium hydroxide-equivalent         | 0.004 kg      |                         |               |
| Water                                                   | 0.029 kg      |                         |               |

#### 2.1.4. Anaerobic digestion

Category 1 material is treated with anaerobic digestion. The data concerning biogas yield (208.25 m<sup>3</sup>CH<sub>4</sub>/t of feedstock from mixture of paunch, dissolved air flotation sludge and soft offal) was obtained from literature (Ware and Power, 2016). The impacts from anaerobic digestion process were assumed to be similar than treatment of biowaste by anaerobic digestion per treated kilogram of feedstock (Ecoinvent).

#### 2.1.5. Gelatine and pectin

The processing of gelatine was modeled based on conventional production method data adapted from (Ma et al., 2019) (Table S7). Several options for gelatine substitutes exist, but due lack of data gelatine was assumed to be substituted with pectin extracted from pomegranate peels, with pectin being equivalent to gelatine in terms of mass. The pectin production was modelled based on the data presented in the study by (Shinde et al., 2020) using mass allocation between products. No impacts were allocated to pomegranate peels from pomegranate production.

*Table S7. Inputs and outputs of gelatine and pectin production. Data concerning gelatine adapted from Ma et al. (2019) and pectin from Shinde et al. (2020).*

| <b>Gelatine</b>   |                          |                |               |
|-------------------|--------------------------|----------------|---------------|
| <b>Inputs</b>     | <b>Amount</b>            | <b>Outputs</b> | <b>Amount</b> |
| Bones             | 1 kg                     | Gelatine       | 0.0699 kg     |
| Electricity       | 0.1514 kWh               | wastewater     | 23.85 l       |
| Hard coal         | 0.0079 kg                |                |               |
| Hydrochloric acid | 0.4788 kg                |                |               |
| Phosphoric acid   | 0.0025 kg                |                |               |
| Quicklime         | 0.1866 kg                |                |               |
| Sodium hydroxide  | 0.0080 kg                |                |               |
| Water             | 1611.0 kg                |                |               |
| Land occupation   | 0.0002 m <sup>2</sup> *a |                |               |
|                   |                          |                |               |
| <b>Pectin</b>     |                          |                |               |
| <b>Inputs</b>     | <b>Amount</b>            | <b>Outputs</b> | <b>Amount</b> |
| Electricity       | 4.0681 MJ                | Pectin         | 1 kg          |
| Ethanol           | 9.1598 kg                |                |               |

### 3. References

- De Rosa-Giglio, P., Fontanella, A., Gonzalez-Quijano, G., Ioannidis, I., Nucci, B., Brugnoli, F., 2018. Product Environmental Footprint Category Rules Leather.
- European Union, 2009. Regulation (EC) No 1069/2009 of the European Parliament and of the Council of 21 October 2009 laying down health rules as regards animal by-products and derived products not intended for human consumption and repealing Regulation (EC) No 1774/2002 (Animal by-products Regulation).
- FEDIAF, 2018. Product Environmental Footprint Category Rules. Prepared Pet Food for Cats and Dogs.
- Gac, A., Lapasin, C., Laspière, P.T., Guardia, S., Ponchant, P., Chevillon, P., Nassy, G., 2014. Co-products from meat processing: the allocation issue, in: Proceedings of the 9th International Conference on Life Cycle Assessment in the Agri-Food Sector (LCA Food 2014). San Francisco, USA. ACLCA, Vashon, WA, USA, pp. 438–442.
- Joseph, K., Nithya, N., 2009. Material flows in the life cycle of leather. *J. Clean. Prod.* 17, 676–682. <https://doi.org/10.1016/j.jclepro.2008.11.018>
- López, D.E., Mullins, J.C., Bruce, D.A., 2010. Energy life cycle assessment for the production of biodiesel from rendered lipids in the United States. *Ind. Eng. Chem. Res.* 49, 2419–2432. <https://doi.org/10.1021/ie900884x>
- Ma, Y., Zeng, X., Ma, X., Yang, R., Zhao, W., 2019. A simple and eco-friendly method of gelatine production from bone: One-step biocatalysis. *J. Clean. Prod.* 209, 916–926. <https://doi.org/10.1016/j.jclepro.2018.10.313>
- Mogensen, L., Nguyen, T.L.T., Madsen, N.T., Pontoppidan, O., Preda, T., Hermansen, J.E., 2016. Environmental impact of beef sourced from different production systems - focus on the slaughtering stage: input and output. *J. Clean. Prod.* 133, 284–293. <https://doi.org/10.1016/j.jclepro.2016.05.105>
- Notarnicola, B., Puig, R., Raggi, A., Fullana, P., Tassielli, G., Camillis, C. De, Rius, A., 2011. Life cycle assessment of Italian and Spanish bovine leather production systems. *AfinidAd LXVIII* 553, 167–180.
- Reckmann, K., Traulsen, I., Krieter, J., 2013. Life Cycle Assessment of pork production: A data inventory for the case of Germany. *Livest. Sci.* 157, 586–596. <https://doi.org/10.1016/j.livsci.2013.09.001>
- Shinde, P.N., Mandavgane, S.A., Karadbhajane, V., 2020. Process development and life cycle assessment of pomegranate biorefinery. *Environ. Sci. Pollut. Res.* 25785–25793. <https://doi.org/10.1007/s11356-020-08957-0>
- U.S. Department of Agriculture, 2019. FoodData Central [WWW Document]. URL <http://fdc.nal.usda.gov/> (accessed 4.28.21).
- Ware, A., Power, N., 2016. Biogas from cattle slaughterhouse waste: Energy recovery towards an energy self-sufficient industry in Ireland. *Renew. Energy* 97, 541–549. <https://doi.org/10.1016/j.renene.2016.05.068>
